# Supplementary material
Source: publisher figshare collection journal article supplement (https://acs.figshare.com/ndownloader/files/24145373)
Supplement: Supplementary file 1 [file 24145373]

## Supporting information

# DNA Origami for Silicon Patterning

*Guillaume Thomas,<sup>1,†</sup> Cheikh Tidiane Diagne,<sup>1</sup> Xavier Baillin,<sup>1</sup> Thierry Chevolleau,<sup>2</sup> Thomas Charvolin,<sup>3</sup> and Raluca Tiron<sup>1\*</sup>*

<sup>1</sup>CEA, LETI, MINATEC Campus, F-38054 Grenoble, France

<sup>2</sup> CNRS/LTM, Université Grenoble Alpes, F-38000 Grenoble, France

<sup>3</sup>CNRS, LTM, F-38000 Grenoble, France

<sup>†</sup>Present adress: Nanomatériaux pour les Systèmes Sous Sollicitations Extrêmes (NS3E),  
(UMR 3208 ISL/CNRS/Unistra), Institut franco-allemand de recherches de Saint-Louis (ISL),  
68300 Saint-Louis, France

**Table S1.** Mg<sup>2+</sup> concentrations (atom/cm<sup>2</sup>) determined by ICP-MS measurements on several SiO<sub>2</sub> substrates (SiO<sub>2</sub>-no.1, SiO<sub>2</sub>-no.2, SiO<sub>2</sub>-no.3, SiO<sub>2</sub>-no.4 and SiO<sub>2</sub>-no.5). 10 μL of the buffer are deposited on a 2 cm × 2 cm piece of SiO<sub>2</sub> substrate and an incubation time of 1 hour is applied for each sample (except for SiO<sub>2</sub>-no.2 and SiO<sub>2</sub>-no.4). After this time, a rinsing with EtOH is applied on substrates SiO<sub>2</sub>-no.3 and SiO<sub>2</sub>-no.4, and a rinsing with DIW/EtOH (9:1) is applied on substrates SiO<sub>2</sub>-no.4 and SiO<sub>2</sub>-no.5. SiO<sub>2</sub>-no.1 is exposed to the buffer but it is not rinsed. Buffer is fixed to 5 mM Tris, 40 mM MgCl<sub>2</sub> at pH 9.

| Sample name             | Protocol    |                    | Concentration (atom/cm <sup>2</sup> ) |
|-------------------------|-------------|--------------------|---------------------------------------|
|                         | Buffer      | Rinsing solvent    | Mg <sup>2+</sup>                      |
| SiO <sub>2</sub> – no.1 | With buffer | No rinsing         | 6.8 x 10 <sup>15</sup>                |
| SiO <sub>2</sub> – no.2 | No buffer   | EtOH               | 1.1 x 10 <sup>12</sup>                |
| SiO <sub>2</sub> – no.3 | With buffer | EtOH               | 8.3 x 10 <sup>13</sup>                |
| SiO <sub>2</sub> – no.4 | No buffer   | DIW/EtOH 9:1 (v:v) | 1.1 x 10 <sup>12</sup>                |
| SiO <sub>2</sub> – no.5 | With buffer | DIW/EtOH 9:1 (v:v) | 7.1 x 10 <sup>12</sup>                |

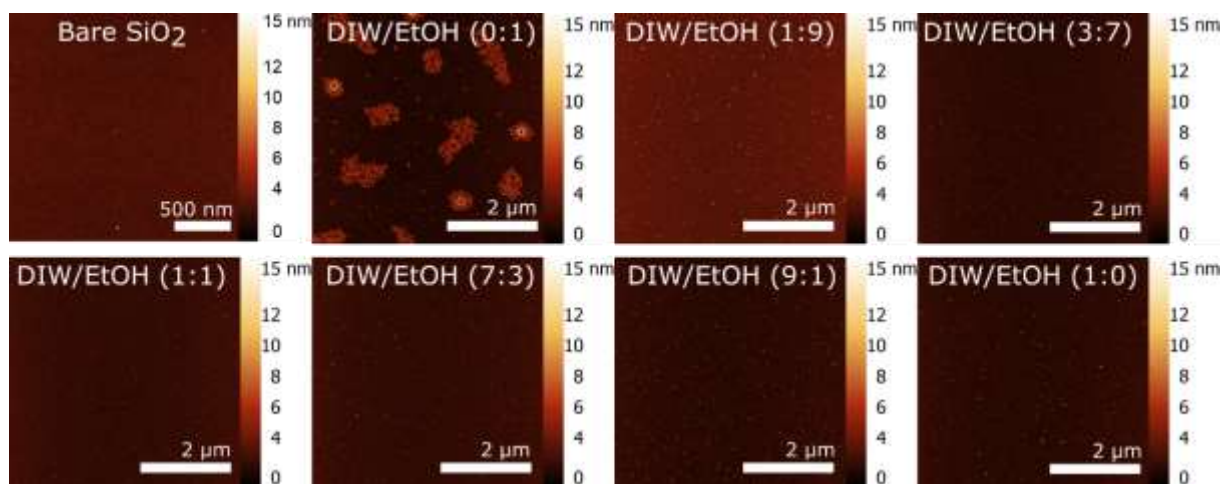

**Figure S1.** AFM images of surfaces rinsed with DIW/EtOH solutions with ratios 1:0, 9:1, 7:3, 1:1, 3:7, 1:9 or 0:1 after an exposure to 10  $\mu\text{L}$  of the buffer (5 mM Tris, 40 mM  $\text{MgCl}_2$  at pH 9). 1 cm  $\times$  1 cm  $\text{SiO}_2$  are used and an incubation time of 1 hour is applied for each sample. A rinsing by immersion (30 s) in a suitable solvent is next applied. All the samples are then etched with HF vapor for 60 s before imaging. Bare  $\text{SiO}_2$  is only etched by HF vapor.

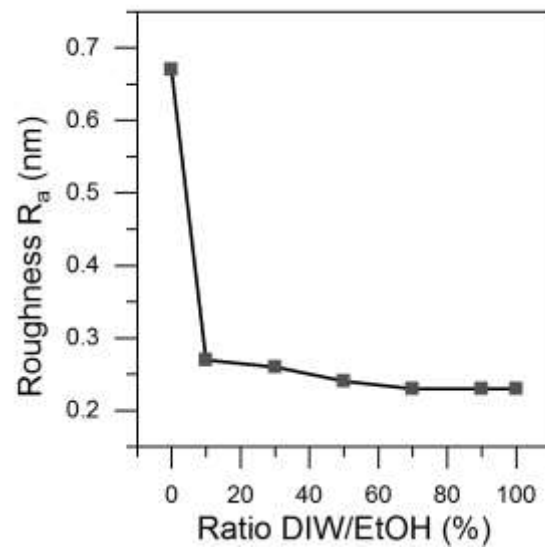

**Figure S2.** Roughness ( $R_a$ ) values of  $\text{SiO}_2$  ( $1 \text{ cm} \times 1 \text{ cm}$ ) substrates rinsed by immersion for 30 s with DIW/EtOH mixtures with ratios 1:0, 9:1, 7:3, 1:1, 3:7, 1:9 or 0:1 after an exposure to  $10 \mu\text{L}$  of the buffer (5 mM Tris, 40 mM  $\text{MgCl}_2$  at pH 9) for 1 h. All the samples are then etched with HF vapor for 60 s. Values are determined from AFM images presented in Fig. S1.

**Table S2.** Mg<sup>2+</sup> concentrations (atom/cm<sup>2</sup>) determined by ICP-MS measurements on several SiO<sub>2</sub> substrates. 10 μL of the buffer are deposited on a 2 cm × 2 cm piece of SiO<sub>2</sub> substrate and an incubation time of 1 hour is applied for each sample. After this time, a rinsing with a mixture of DIW/EtOH with different ratio is applied on substrates for 30 s. Buffer is fixed to 5 mM Tris, 40 mM MgCl<sub>2</sub> at pH 9.

| Ratio DIW/EtOH | Concentration Mg <sup>2+</sup><br>(atom/cm <sup>2</sup> ) |
|----------------|-----------------------------------------------------------|
| 1:0            | 4.5 x 10 <sup>12</sup>                                    |
| 9:1            | 7.1 x 10 <sup>12</sup>                                    |
| 7:3            | 7.6 x 10 <sup>12</sup>                                    |
| 1:1            | 7.6 x 10 <sup>12</sup>                                    |
| 3:7            | 7.9 x 10 <sup>12</sup>                                    |
| 1:9            | 1.2 x 10 <sup>13</sup>                                    |
| 0:1            | 1.2 x 10 <sup>13</sup>                                    |

**Table S3.** Density of DNA origami (number of DNA origami/ $\mu\text{m}^2$ ) after rising with 9:1 (v:v) DIW/EtOH. Samples were exposed to HF etching. The concentration of DNA origami is 1.5 nM

| Solvent                         | 9:1 (v:v) DIW/EtOH |               |               |
|---------------------------------|--------------------|---------------|---------------|
| Rinsing time (s)                | 10                 | 30            | 60            |
| Density (DNA/ $\mu\text{m}^2$ ) | $2 \pm 0.6$        | $1.9 \pm 0.5$ | $1.4 \pm 0.8$ |

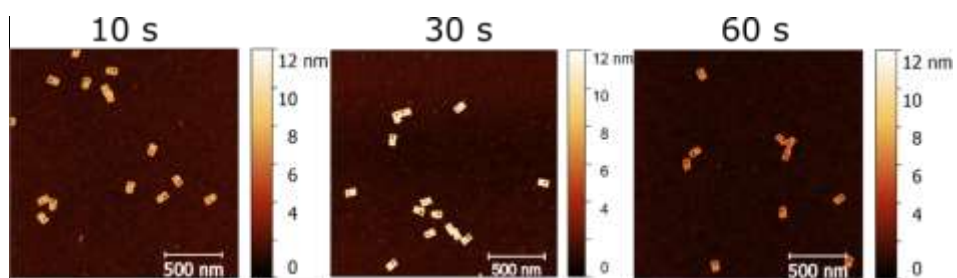

**Figure S3.** AFM images of SiO<sub>2</sub> substrates (thickness = 15 nm) after HF vapor etching (60 s). Samples were exposed to a buffer solution only (5 mM Tris, 40 mM MgCl<sub>2</sub>, pH = 9) and rinsed by 9:1 (v:v) DIW/EtOH mixture for 10, 30 or 60 s.

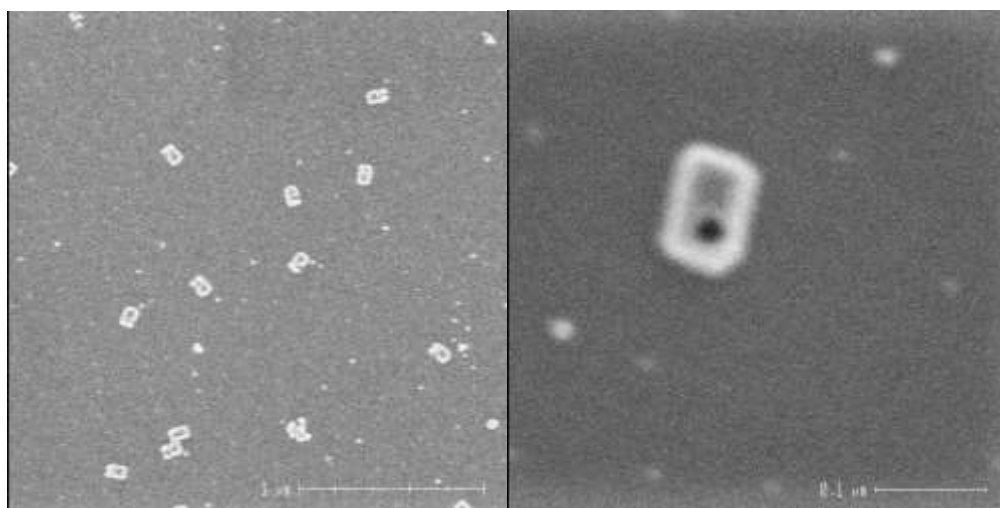

**Figure S4.** SEM image of Si patterns after 20 s of etching time with a large view (scale bare is 1 μm) and with closed view (scale bare is 0.1 μm)
